# Supplementary material
Source: publisher figshare collection journal article supplement (https://acs.figshare.com/ndownloader/files/4277148)
Supplement: Supplementary file 1 [file 4277148]

Supporting Information for 'Optimization of sol-gel formed ZnO:Al processing parameters by observation of dopant ion location using solid state  $^{27}\text{Al}$  NMR'

Tim Kemmitt, Bridget Ingham and Rachael Linklater

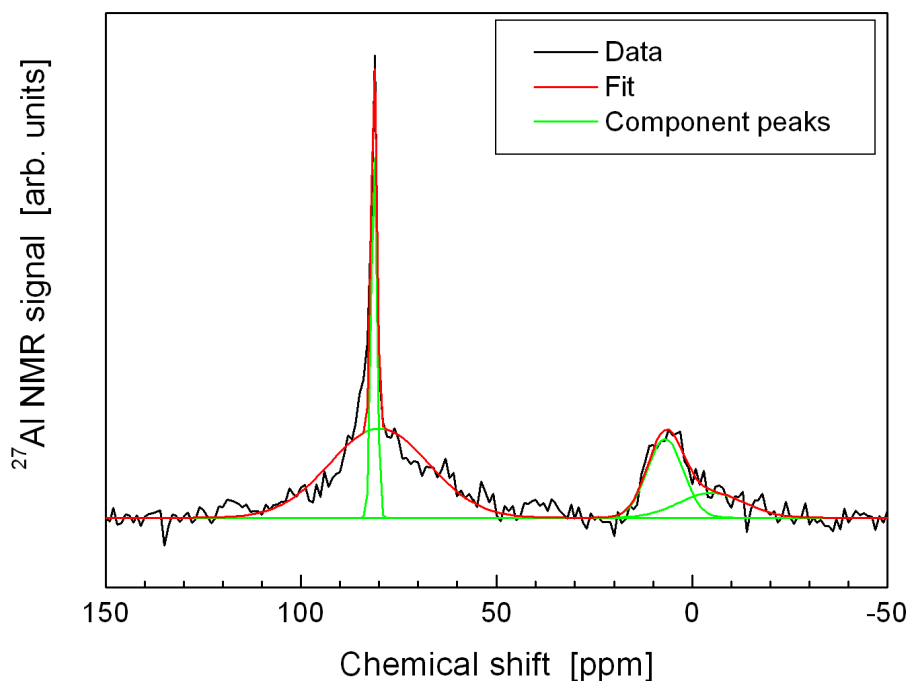

**Figure S1.** Example of deconvolution of  $^{27}\text{Al}$  NMR spectrum for a 2 at% Al-doped ZnO samples prepared using ethanolamine, pre-heated at 90°C and calcined at 500°C for 1 hr.

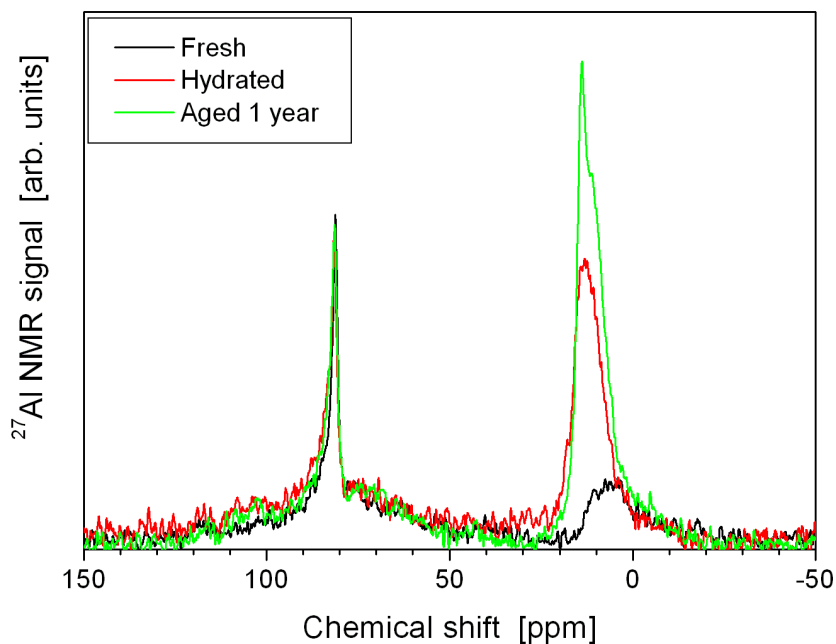

**Figure S2.**  $^{27}\text{Al}$  NMR spectra for a sample prepared under 'standard' conditions (EA as aminoalcohol species, 2 at% Al) - freshly prepared (black), stored in 100% humid atmosphere for 3 days (red), stored in ambient conditions for 1 year (green).

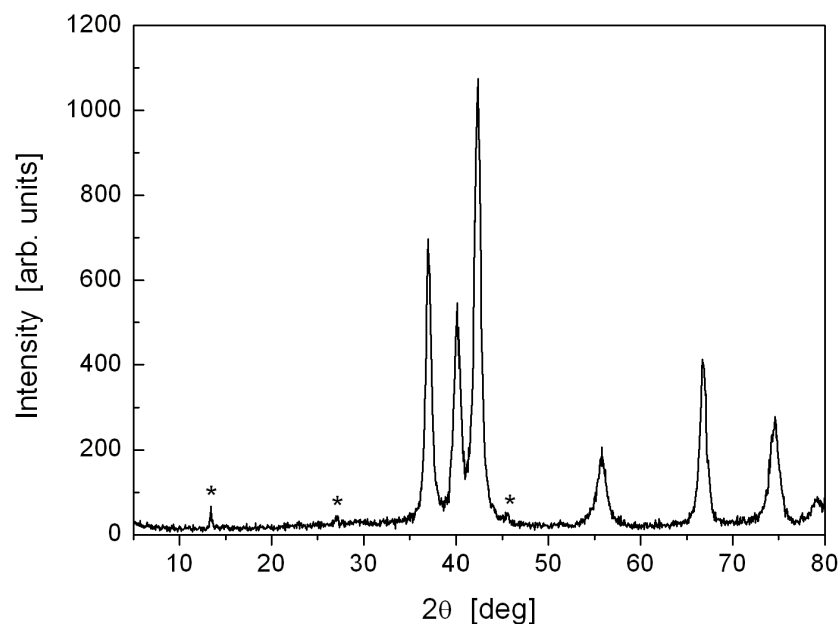

**Figure S3.** XRD pattern for the sample in Figure S1 stored in ambient conditions for 1 year, showing ZnO peaks and additional peaks (\*) which can be assigned to a zinc aluminium carbonate hydroxide hydrate (ICDD pattern 48-1022).

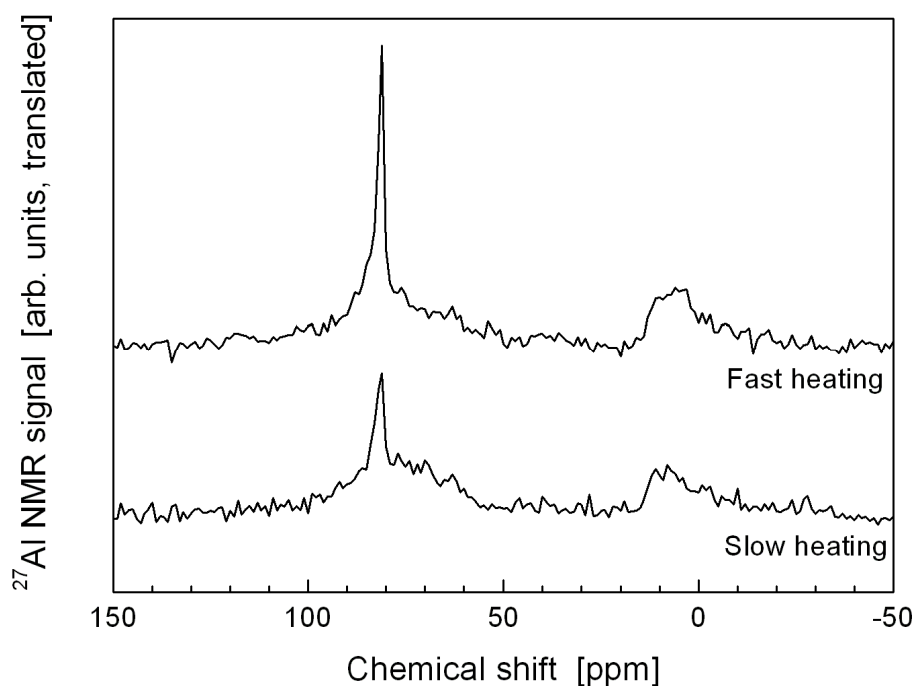

**Figure S4.**  $^{27}\text{Al}$  NMR spectra of 2 at% Al-doped ZnO samples heated to 500°C for 1 h, in a preheated oven (top), and with a heating rate of 2° min<sup>-1</sup> (bottom).

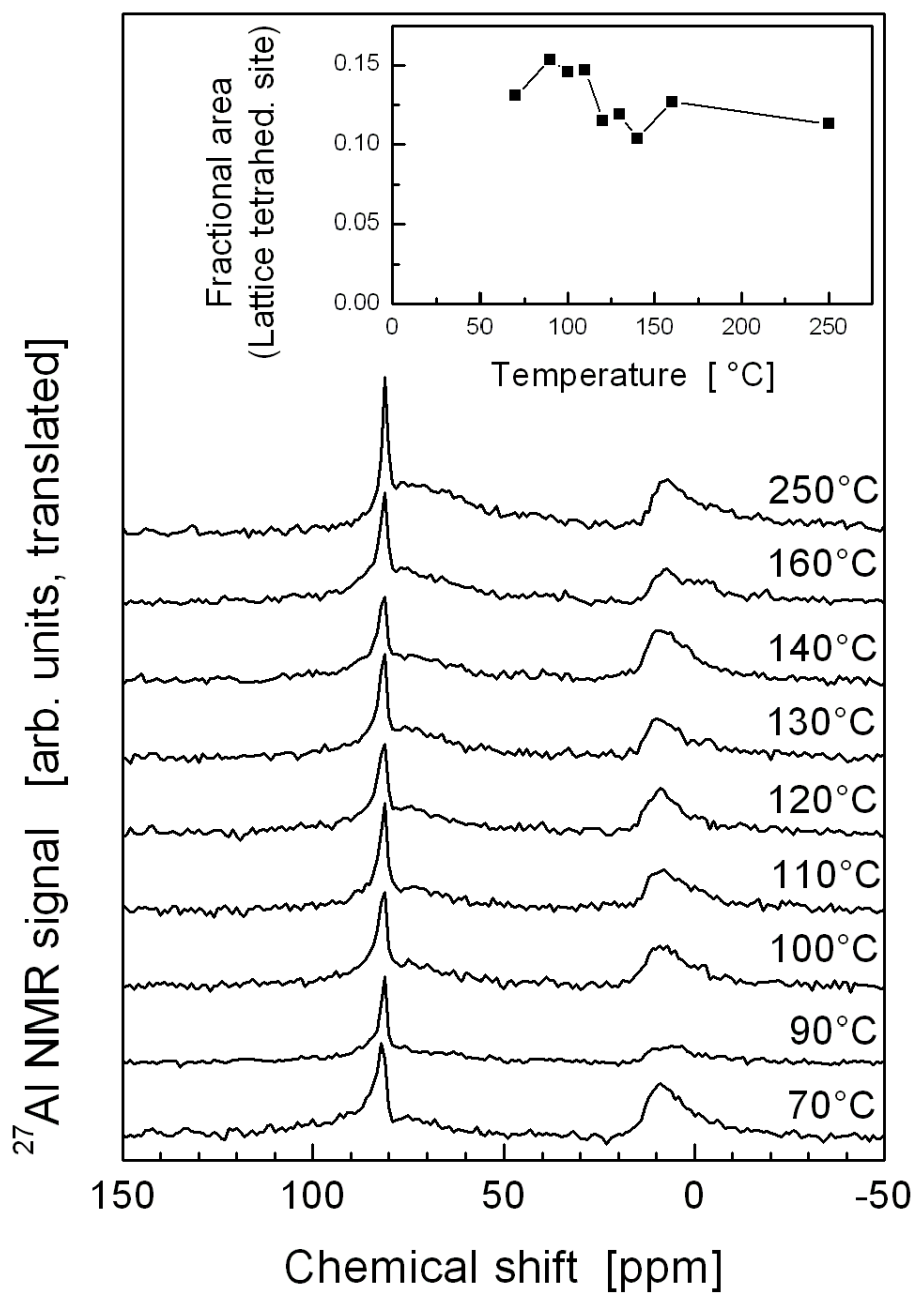

**Figure S5.**  $^{27}\text{Al}$  NMR spectra of 2 at% Al-doped ZnO samples heated at various intermediate temperatures (as indicated) prior to calcination at 500°C for 1 hr.

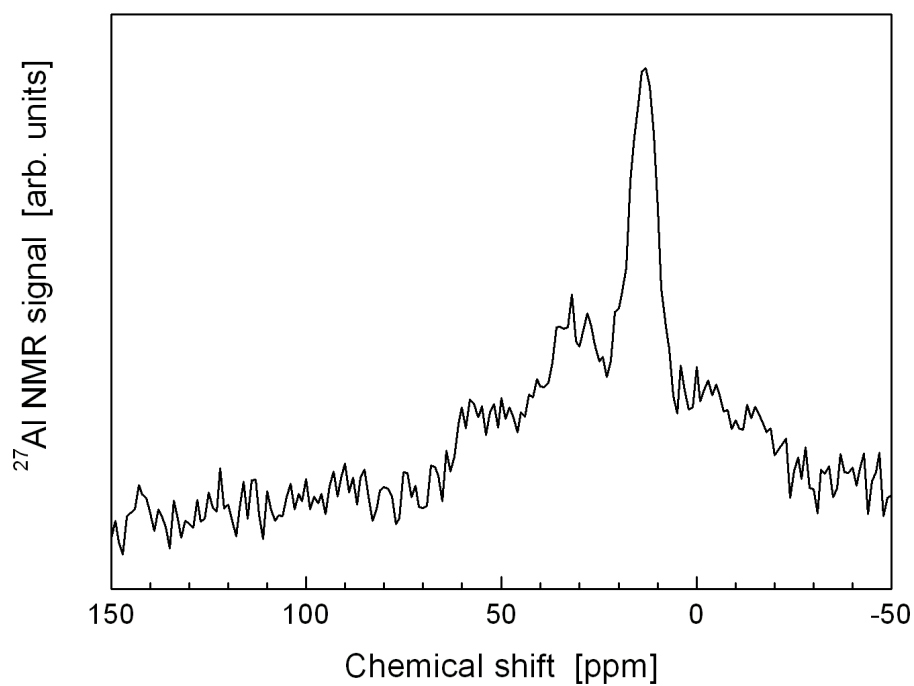

**Figure S6.**  $^{27}\text{Al}$  NMR of 2 at % Al doped ZnO prepared using a precursor containing 40% v/v glycerol.

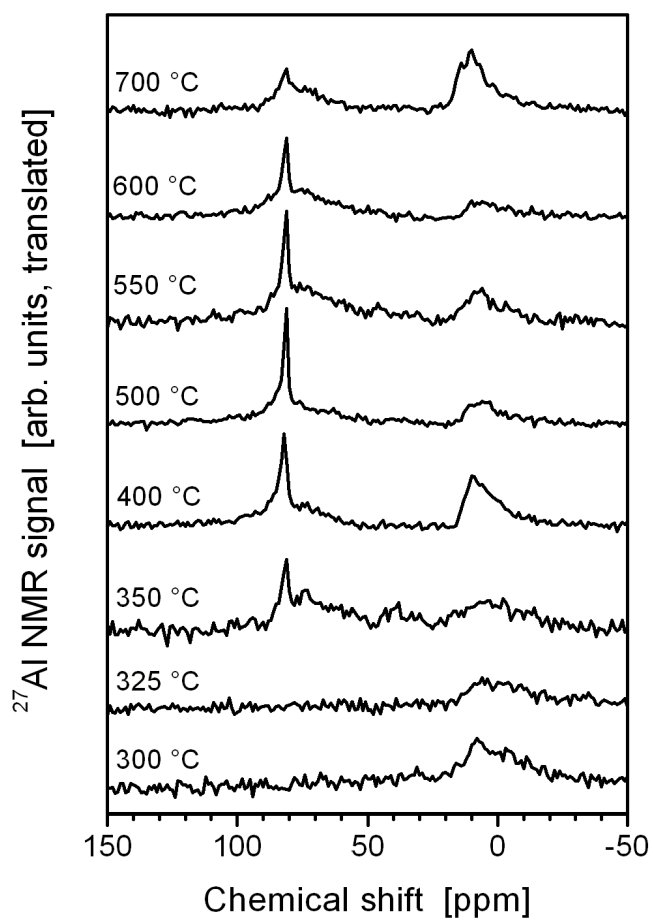

**Figure S7.**  $^{27}\text{Al}$  NMR signals in 2 at % Al-doped samples heated for 1 h at various temperatures (as indicated).

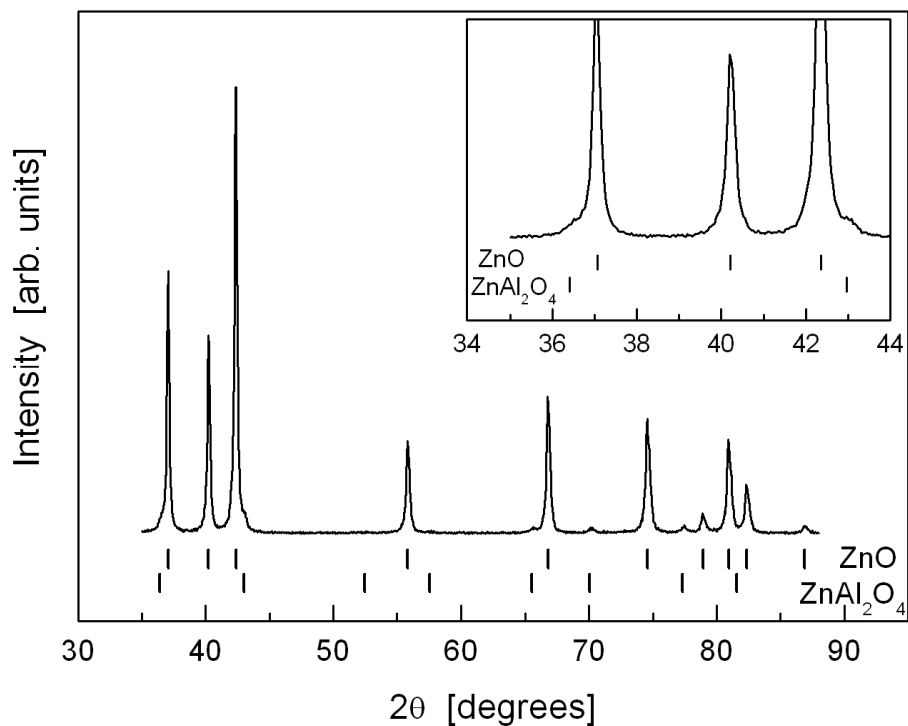

**Figure S8.** XRD of sol-gel formed ZnO containing 8 at% Al dopant calcined at 800°C, showing the presence of the gahnite ( $\text{ZnAl}_2\text{O}_4$ ) phase.

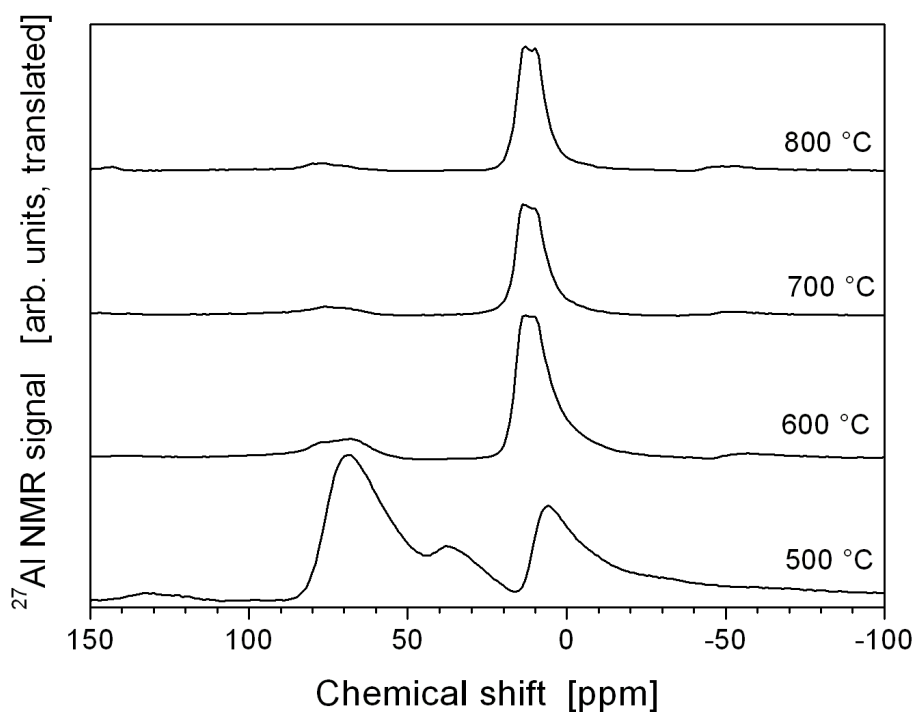

**Figure S9.** Evolution of  $^{27}\text{Al}$  NMR spectra with temperature, of gahnite formation from  $\text{ZnAl}_2\text{O}_4$  gel calcined at various temperatures (as indicated).

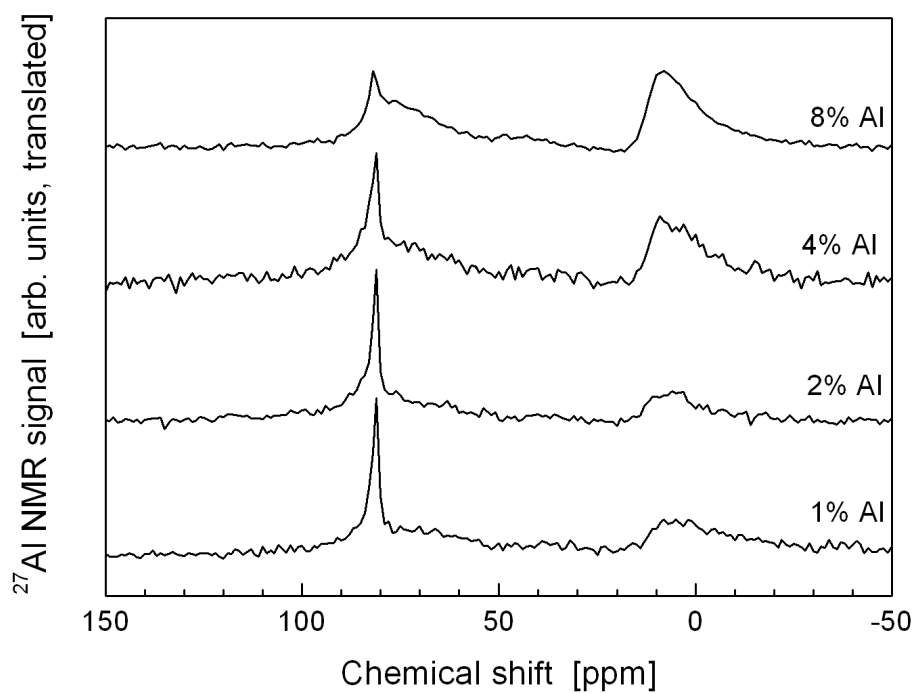

**Figure S10.**  $^{27}\text{Al}$  NMR spectra of ZnO samples containing various levels of Al dopant (as indicated). Gels were pre-heated at  $90^\circ\text{C}$  and calcined at  $500^\circ\text{C}$ .

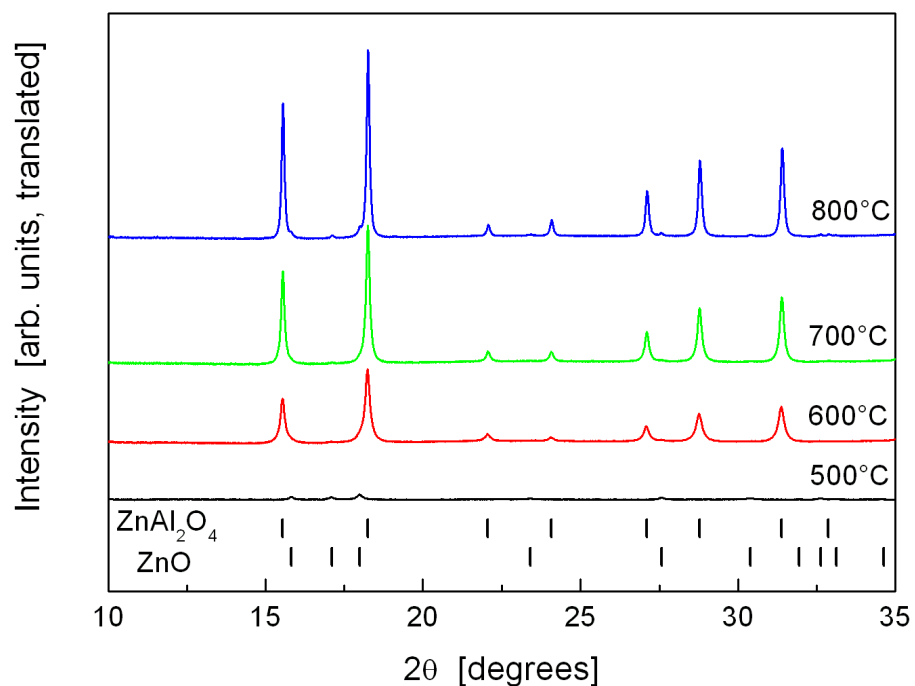

**Figure S11.** Synchrotron powder XRD patterns of  $\text{ZnAl}_2\text{O}_4$  gel calcined at various temperatures (as indicated).
